# Supplementary material for: Morphology Evolution in High‐Performance Polymer Solar Cells Processed from Nonhalogenated Solvent
Source: PubMed Central journal article supplement (PMC5115419; doi:10.1002/advs.201500095), 2015-05-26
Supplement: ADVS-2-0g-s001.pdf [file ADVS-2-0g-s001.pdf]

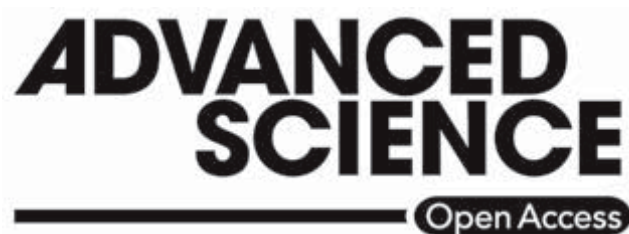

## Supporting Information

for *Adv. Sci.*, DOI: 10.1002/advs.201500095

### **Morphology Evolution in High-Performance Polymer Solar Cells Processed from Nonhalogenated Solvent**

*Wanzhu Cai, Peng Liu, Yaocheng Jin, Qifan Xue, Feng Liu,\*  
Thomas P. Russell,\* Fei Huang,\* Hin-Lap Yip,\* and Yong  
Cao*

## Supporting Information

**Morphology Evolution in High Performance Polymer Solar Cells Processed from Non-halogenated Solvent**

Wanzhu Cai, Peng Liu, Yaocheng Jin, Qifan Xue, Feng Liu,\* Thomas P. Russell,\* Fei Huang,\* Hin-Lap Yip,\* and Yong Cao

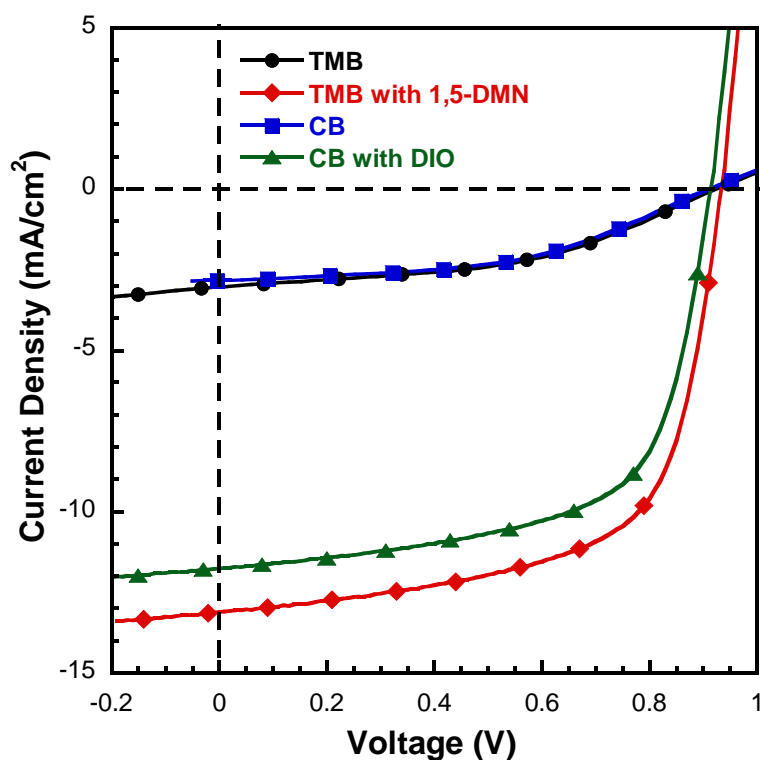

**Figure S1.** J-V curves of devices processed by different solvent under simulated 100 mW/cm<sup>2</sup> AM 1.5G illumination, device configuration is ITO/PEDOT:PSS/Active layer/PFN/Al, the active area of the device is 0.16cm<sup>2</sup>.

**Table S1.** Photovoltaic performance of polymer solar cells based on PDTSTPD: PC<sub>71</sub>BM processed from different solvent. Device configuration is ITO/PEDOT:PSS/Active layer/PFN/Al, the active area of the device is 0.16cm<sup>2</sup>.

| Solvents    | V <sub>oc</sub> (V) | J <sub>sc</sub> (mA/cm <sup>2</sup> ) | FF(%)    | PCE(%)    |
|-------------|---------------------|---------------------------------------|----------|-----------|
| TMB         | 0.90±0.01           | 2.85±0.15                             | 42.1±2.0 | 1.12±0.10 |
| TMB+1,5-DMN | 0.91±0.01           | 12.89±0.20                            | 62.9±1.2 | 7.56±0.21 |
| CB          | 0.89±0.01           | 2.71±0.10                             | 45.3±1.4 | 1.11±0.09 |
| CB + DIO    | 0.91±0.00           | 11.21±0.38                            | 60.6±2.5 | 6.71±0.12 |

We have also studied the solvent additive effect of 1,2-dimethylnaphthalene, the improvement gain from 1,2-DMN is less than 1,5-DMN. And the results showed the phase separation of TMB+1,5DMN film is more pronounced.

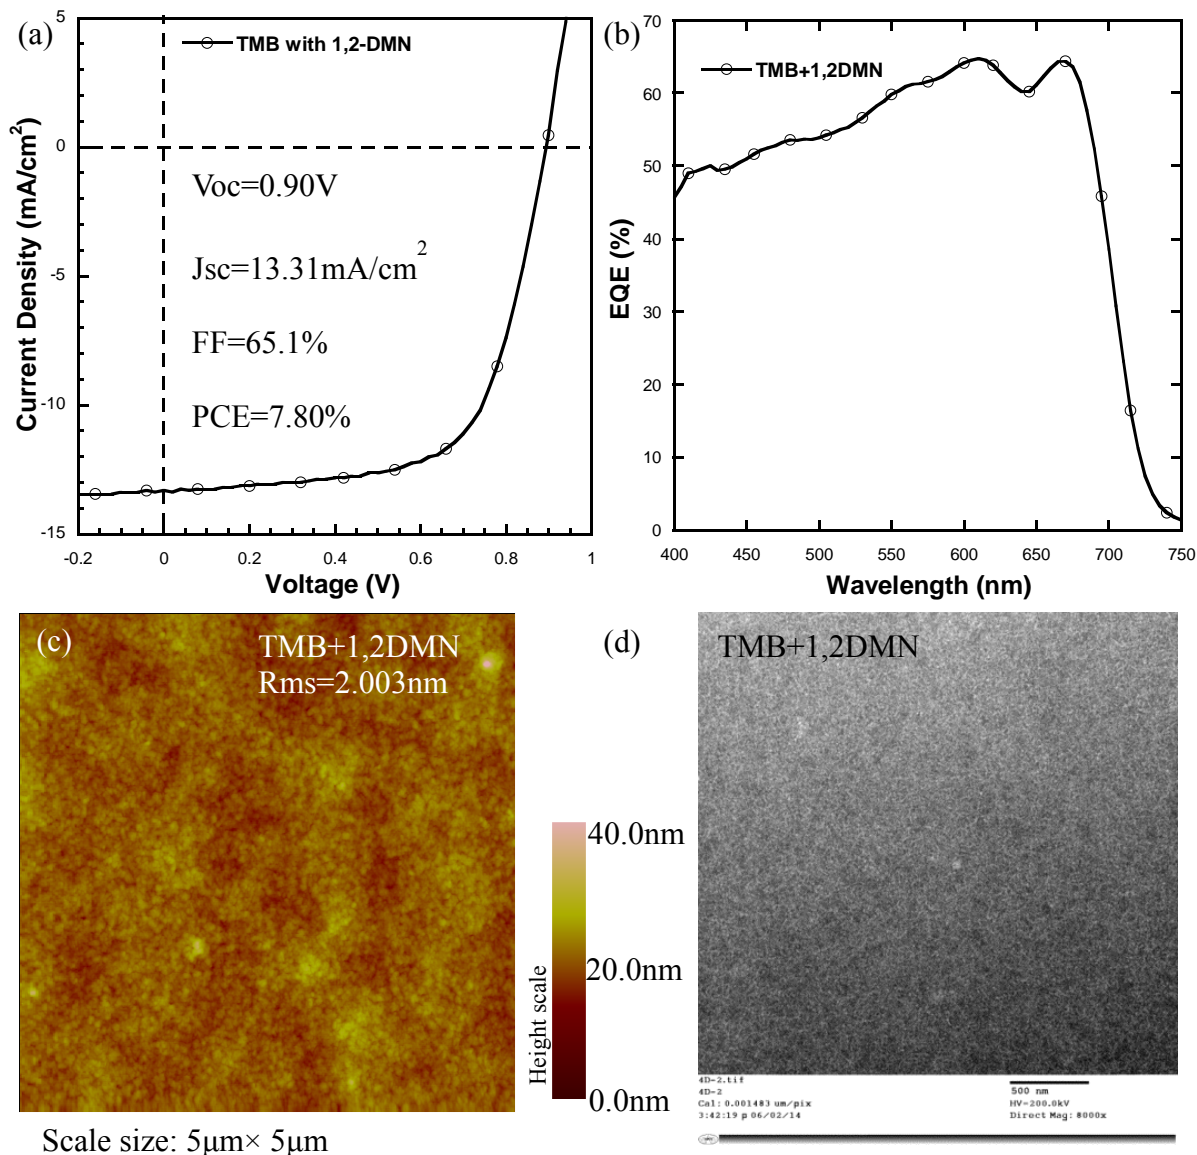

**Figure S2.** (a) J-V curves and (b) EQE spectra of devices processed by TMB with 1,2-dimethylnaphthalene under simulated 100 mW/cm<sup>2</sup> AM 1.5G illumination, device configuration is ITO/PFNOX/Active layer/MoO<sub>3</sub>/Al. (c) AFM images and (b) TEM images of the corresponding film.

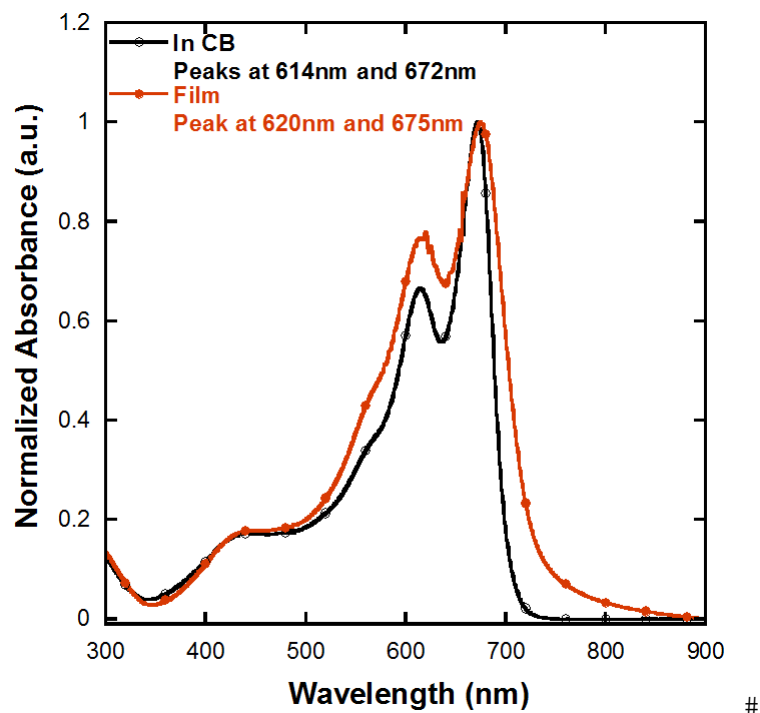

**Figure S3.** Normalized UV-Vis absorption spectra of pristine PDTSTPD in solution (black open circle) and films (red filled circle)#

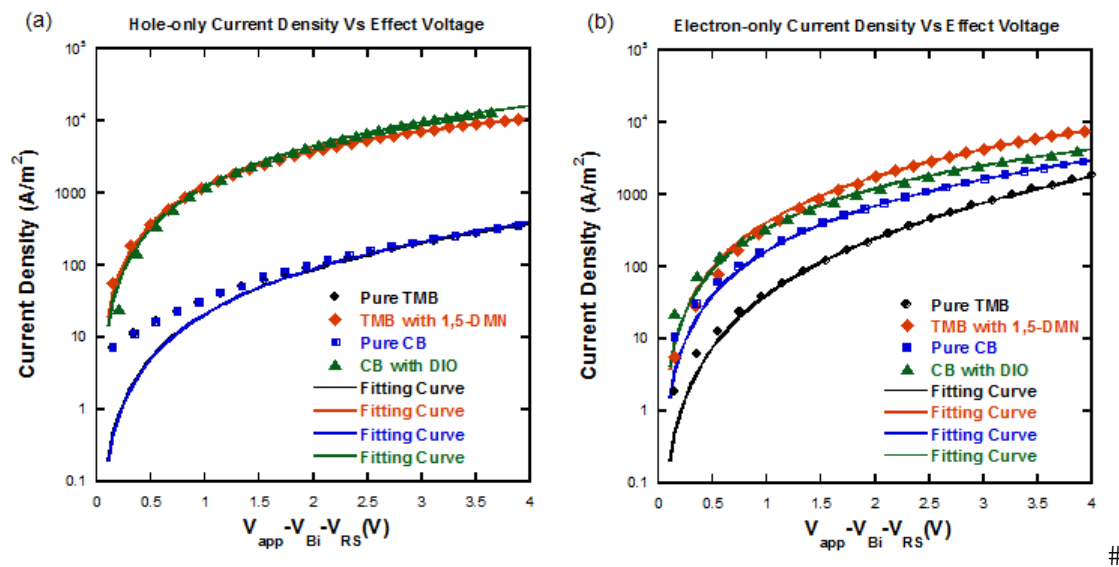

**Figure S4.** (a) J-V characteristics of devices in hole-only device ITO/MoO<sub>3</sub>/PDTSTPD:PC<sub>71</sub>BM/ PEDOT:PSS /Al and (b) electron-only device ITO/PFNOX/PDTSTPD:PC<sub>71</sub>BM/PFN/Al, in which the active layer was processed by different solvent. The solid lines represent the fitting curves.

**Table S2.** Fitting results contained mobility and field activation factor.

| Solvent and Additive | Hole Mobility ( $\text{cm}^2/\text{V/s}$ ) ,   | Electron Mobility (                            |
|----------------------|------------------------------------------------|------------------------------------------------|
|                      | field activation factor ( $\text{m}^{1/2}$     | $\text{cm}^2/\text{V/s}$ ) ,field activation   |
|                      | $\text{V}^{-1/2}$ )                            | factor( $\text{m}^{1/2} \text{V}^{-1/2}$ )     |
| Pure TMB             | $4.8 \times 10^{-6}$ , $2.921 \times 10^{-5}$  | $3.7 \times 10^{-6}$ , $3.39 \times 10^{-4}$   |
| TMB with 1,5-DMN     | $5.8 \times 10^{-4}$ , $-2.117 \times 10^{-4}$ | $8.6 \times 10^{-5}$ , $-5.699 \times 10^{-5}$ |
| Pure CB              | $4.4 \times 10^{-6}$ , $5.32 \times 10^{-5}$   | $3.6 \times 10^{-5}$ , $3.933 \times 10^{-5}$  |
| CB with DIO          | $3.8 \times 10^{-4}$ , $-7.097 \times 10^{-5}$ | $1.1 \times 10^{-4}$ , $-8.575 \times 10^{-5}$ |

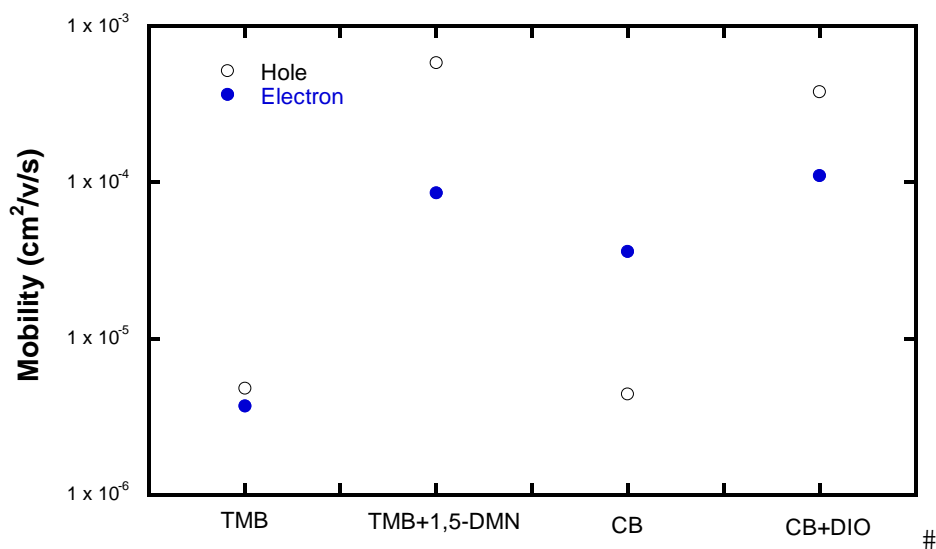

**Figure S5.** Mobility derived by SCLC model from  $J$ - $V_{\text{eff}}$  characteristics of hole/electron only device.

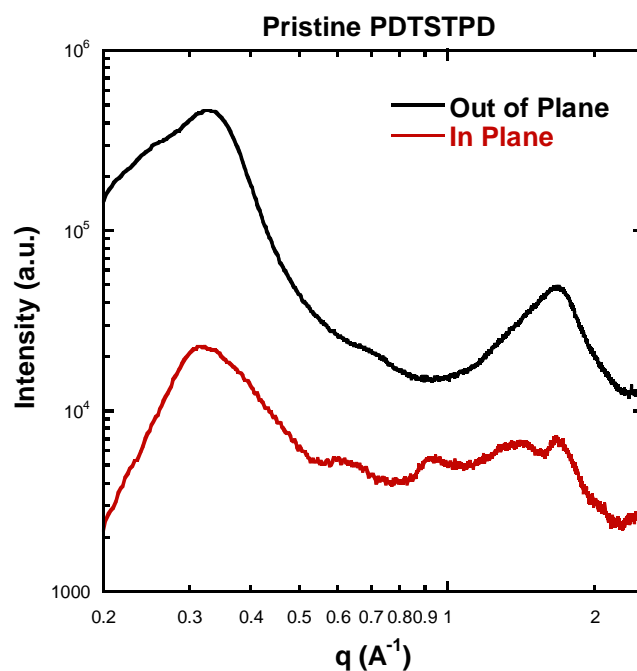

**Figure S6.** Line-cut profiles of GIXD of Pristine PDTSTPD film.

Figure S6 displays the GIXD profiles along the out-of-plane and in-plane direction of the 2D images for pure PDTSTPD film. In the out-of-plane direction, one strong (100) reflection at  $0.31 \text{ \AA}^{-1}$  along with a weaker (200) reflection at about  $0.62 \text{ \AA}^{-1}$  is observed at low  $q$  region, which attributes the interchain packing units with a space distance of 2.0 nm. The next peak at  $1.69 \text{ \AA}^{-1}$  is from the (010)  $\pi$ - $\pi^*$  stacking plane reflection, corresponding to a space distance of 0.37 nm. In the in-plane direction, clear reflections for (100) reflection and  $1.68 \text{ \AA}^{-1}$  for (010) reflection are also found, along with (200) and (300) reflection. These results suggest PDTSTPD molecule prefer a random crystalline orientation in pristine film.

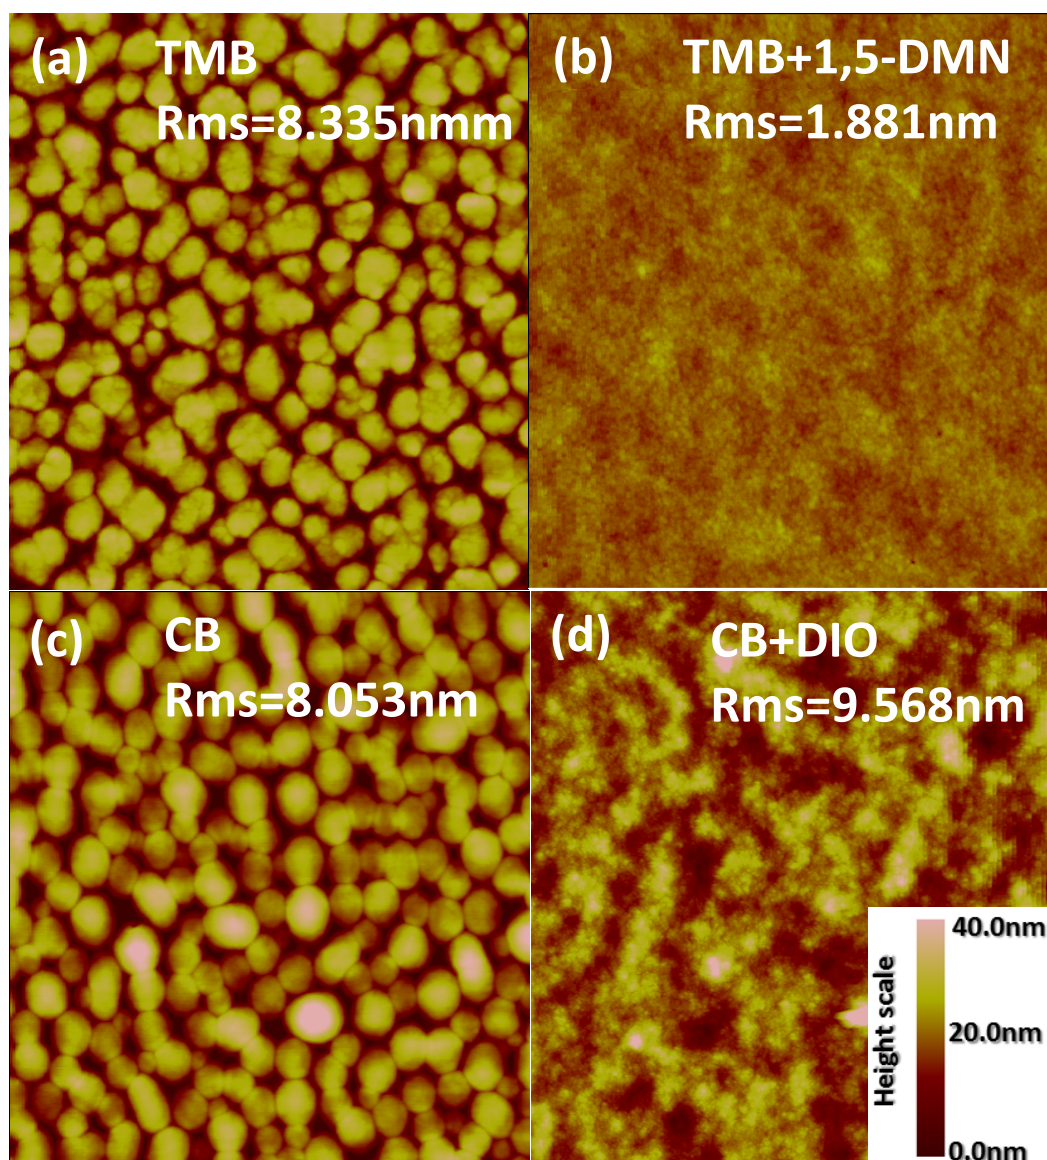

**Figure S7.** AFM images (5 μm × 5 μm) of PDTSTPD: PC<sub>71</sub>BM (weight ratio:1/2) blends films processed by different solvent. (a) Pure TMB, (b) TMB with 30mg/ml 1,5-DMN, (c) Pure CB, (d) CB with 3vol% DIO.

**Table S3.** Comparing the measured J<sub>sc</sub> and theoretical J<sub>sc</sub> of test cells.

| Solvent and Additive | Measured J <sub>sc</sub> (mA/cm <sup>2</sup> ) | Calculated J <sub>sc</sub> (mA/cm <sup>2</sup> ) |
|----------------------|------------------------------------------------|--------------------------------------------------|
| Pure CB              | 3.10 ± 0.12                                    | 3.3                                              |
| CB with DIO          | 12.34 ± 0.49                                   | 10.75                                            |
| Pure TMB             | 3.42 ± 0.19                                    | 3.63                                             |
| TMB with 1,5-DMN     | 13.54 ± 0.27                                   | 11.64                                            |
